# Supplementary material for: Nutrient stocks, flows and balances for the Bolivian agri-food system: Can recycling human excreta close the nutrient circularity gap?
Source: Frontiers journal article supplement (doi:10.3389/fenvs.2022.956325), 2022-07-25
Supplement: Data_Sheet_1.xlsx [file Data_Sheet_1.xlsx]

## Sheet: Table S1. Fertilizers
	Process	Imported and domestic synthetic fertiliser
	Fertiliser	Mass applied (tons)	N content (%)	P content (%)
	Urea	48165	45	0
	Di-ammonium Phosphate (DAP)	34269	46	46
	Monoammonium phosphate (MAP)	28841	52	52
	“Triple” 15-15-15	16110	15	15
	Ammonium sulphate	710	21	0
	Data source	a	a	a

## Sheet: Table S2. Crops
	Process		Biological fixation	Crop residues (outflow)		Crop residues (inflow)	Emissions from left over residues	Crop yield 2014 (tons)								Production 2018 estimated on porportion from croop yield 2014 (tons)								Data for optimum sufficiency
	Crop	Crop yield (tons country)	Biologically fixed nitrogen (%)	N in left over crop residues (tons country)	Ratio N:P in crop residues	Ratio N mass per ton of harvested mass (kg N)	Volatilized N in left crop residues (tons country)	Bolivia	Altiplano	Amazonia	Chaco	Chiquitania y pantanal	Llanuras y sabanas	Valles	Yungas y Chapare	Bolivia	Altiplano	Amazonia	Chaco	Chiquitania y pantanal	Llanuras y sabanas	Valles	Yungas y Chapare	Current yield (ton/ha)	Optimum yield (ton/ha)	Data source
	Apples	2805				3.11111		2001.13			4.46853			1859.94	136.721	2805	0	0	6.26357	0	0	2607.09	191.643	3.82153	15	FAOSTAT (Peru)
	Avocados	12452				15		11279.9		122.866	71.0237	1134.34		4507.3	5444.32	12452	0	135.634	78.4041	1252.22	0	4975.68	6010.07	5.40921	6	FAOSTAT (paraguay)
	Bananas	305950				6.33333		436295	3.13964	58933.4		36980.3	16134.3	1113.67	323130	305950	2.20166	41326.8	0	25932.3	11314.1	780.959	226594	15.1799	20	Sousa (2004)
	Barley	46620		786.976	2.112 : 0.419 (f)	25	9.60909	47966.9	20825.9					26984.2	156.779	46620	20241.1	0	0	0	0	26226.5	152.376	0.872593	1.5	FAOSTAT (peru)
	Beans, dry	107709	36	1159.76	3.557 : 0.396 (f)	80	14.1909									107709								1.31828	1.5	FAOSTAT (chile)
	Beans, green	1589						32067.2	18.9803	64.0317	4316.68	18594.8	399.49	8154.09	519.174	1589	0.940513	3.17291	213.901	921.411	19.7956	404.053	25.7262	3.46943	3.3	FAOSTAT (peru)
	Brazil nuts, with shell	34196				15.012		28.9577		7.49309		21.4646				34196	0	8848.56	0	25347.4	0	0	0		4.9	FAOSTAT (peru)
	Broad beans, horse beans, dry	13311	65			76		35844.4	11527.3					23221.7	1095.37	13311	4280.74	0	0	0	0	8623.49	406.773	0.952487	1.4	FAOSTAT (peru)
	Cabbages and other brassicas	4623				6		3713.54		13.3576				3700.18		4623	0	16.6289	0	0	0	4606.37	0	7.5416	14	FAOSTAT (peru)
	Carrots and turnips	67972				25		61999.6	14191.8			3538.94		44268.9		67972	15558.9	0	0	3879.84	0	48533.2	0	12.6201	22	FAOSTAT (peru)
	Cassava	201375				5.35135		199529	0.915729	30174.5	8368.21	82335.6	29862.9	357.625	48429.1	201375	0.924202	30453.7	8445.63	83097.4	30139.2	360.934	48877.2	6.85462	14	Cunha (2018)
	Cauliflowers and broccoli	781						1621.26			9.2984			1611.96		781	0	0	4.47926	0	0	776.521	0	5.91667
	Cereals nes	777														777								0.641089
	Cherries	914														914								2.3198
	Cherries, sour	71														71								1.29091
	Chestnut	84255				9.8										84255								1.47831	4.5	FAOSTAT (peru)
	Chick peas	670	65			121.4		123.066						123.066		670	0	0	0	0	0	670	0	2.30241	2	Sousa (2004)
	Chillies and peppers, green	11755				45		10674.4		132.982	542.937	647.18	55.034	7667.66	1628.57	11755	0	146.445	597.903	712.698	60.6055	8443.91	1793.44	2.88183	15	FAOSTAT (peru)
	Cocoa, beans	5846				33		5933.79	5.46906	364.877		46.8849	134.117	2.83609	5379.6	5846	5.38815	359.479	0	46.1913	132.133	2.79413	5300.01	0.565323	0.8	FAOSTAT (brazil)
	Coffee, green	22121				100		20378.3		26.943		526.326		408.461	19416.6	22121	0	29.247	0	571.335	0	443.391	21077	0.899374	1.5	FAOSTAT (brazil)
	Cucumbers and gherkins	4686				3.13333		4615.49		375.359	30.5683			4209.57		4686	0	381.093	31.0352	0	0	4273.87	0	8.59817	18	FAOSTAT (peru)
	Figs	667						477.058						477.058		667	0	0	0	0	0	667	0	5.13077
	Fruit, fresh nes	3039														3039								4.13469
	Garlic	2569				42		2147.46	19.4472					2128.02		2569	23.2646	0	0	0	0	2545.74	0	3.56806	6	Faquin (2004)
	Grapefruit (inc. pomelos)	3749						2085.94		590.441	2.37743		288.235	540.523	664.362	3749	0	1061.18	4.27289	0	518.036	971.467	1194.04	8.57895
	Grapes	22674				3.14286		17946	20.8669		210.208			17714.9		22674	26.3645	0	265.589	0	0	22382	0	6.96376	11	FAOSTAT (argentina)
	Groundnuts (peanuts), with shell	26847	65			104		24416.9		42.0661	18136.6	4396.69		1366.34	475.25	26847	0	46.2527	19941.6	4834.27	0	1502.33	522.549	1.40494	2	Sousa (2004)
	Lemons and limes	32484				4.38889		28393.7		195.37	79.4687	19506.4		4411.24	4201.22	32484	0	223.514	90.9166	22316.4	0	5046.71	4806.43	7.49515	11	FAOSTAT (peru)
	Lettuce and chicory	18292				40		8210.05	8.20956	34.8571	4.5631	910.099		6694.95	557.371	18292	18.2909	77.6617	10.1666	2027.7	0	14916.4	1241.82	6.50267	10	FAOSTAT (peru)
	Linseed	65						7.69353						7.69353		65	0	0	0	0	0	65	0	0.252918
	Maize	1260926	10	11348	0.59 : 0.31 (e)	28	138.982	949700	4386.44	13335.7	321143	389030	8947.7	195918	16939.7	1260926	5823.92	17705.9	426385	516519	11879.9	260122	22491	2.72817	6.6	FAOSTAT (region)
	Maize, green	25215	10			34										25215								2.67505	9	FAOSTAT (peru)
	Mangoes, mangosteens, guavas	17613				6.53		16654.7		2671.1	255.324	7581.76	822.357	345.984	4978.21	17613	0	2824.79	270.015	8017.99	869.673	365.891	5264.64	8.21119	13	FAOSTAT (peru)
	Oats	21906		287.999	0.676 : 0.14 (f)	27	3.5	8530.95	1954.37			86.7055		6441.21	48.6661	21906	5018.48	0	0	222.645	0	16539.9	124.966	1.53414	1.4	FAOSTAT (peru)
	Onions, dry	87372				30		78418	11453.8	37.6233	925.245	2203.38		63775	22.9718	87372	12761.6	41.9192	1030.89	2454.97	0	71057	25.5948	11.6387	15	Faquin (2004)
	Oranges	189335				5.875		177852		4950.3	4397.34	12169.8	173.144	5033.48	151128	189335	0	5269.9	4681.24	12955.5	184.322	5358.46	160886	8.24558	15	FAOSTAT (peru)
	Papayas	18040				2.15652		17624.1		298.624	5.45864	3280.17	368.94	944.759	12726.2	18040	0	305.671	5.58744	3357.56	377.646	967.052	13026.5	7.7127	14	FAOSTAT (peru)
	Peaches and nectarines	59642				3.8		53158.4	313.967		2453.72			48551	1839.74	59642	352.261	0	2753	0	0	54472.6	2064.12	6.95452	16	FAOSTAT (argentina)
	Pears	1967				1.875		1651.88						1651.88		1967	0	0	0	0	0	1967	0	5.31622	8	FAOSTAT (peru)
	Peas, dry	4722														4722								1.27691	1.7	FAOSTAT (argentina)
	Peas, green	21649	65			100		18057.4			1725.1			15790.4	541.886	21649	0	0	2068.23	0	0	18931.1	649.668	1.28963	2	FAOSTAT (argentina)
	Pepper (piper spp.)	29						182.739						182.739		29	0	0	0	0	0	29	0	0.763158
	Pineapples	86204				0.8		79362.9		2522.87		1686.54	690.794		74462.7	86204	0	2740.34	0	1831.92	750.34	0	80881.4	17.265	20	Sousa (2004)
	Plantains and others	493524				1.9		285531	4.55021	5309.36	104.626	3798.47	3621.44	1963.05	270730	493524	7.86477	9176.92	180.841	6565.43	6259.45	3393.02	467940	12.0495	11	FAOSTAT (venezuela)
	Plums and sloes	4189						3165.1	44.4081		129.374			2880.41	110.906	4189	58.774	0	171.226	0	0	3812.22	146.784	10.0456
	Potatoes	1160940		5013.91	59 : 6 (d)	3.6	61.4091	1.11098e+06	378687	1.8	8433.46	14521.6		673755	35579.6	1160940	395717	1.88095	8812.73	15174.6	0	704055	37179.6	6.42106	15	FAOSTAT (peru)
	Pumpkins, squash and gourds	24629				40		19550			4464.92	4151.67		9513.19	1420.18	24629	0	0	5624.9	5230.27	0	11984.7	1789.14	7.62272	14	FAOSTAT (argentina)
	Quinces	128														128
	Quinoa	70763				20.4		76138.1	73095.4					3038.87	3.81116	70763	67935.1	0	0	0	0	2824.34	3.5421	0.634049	1.3	FAOSTAT (peru)
	Rice, paddy	541157		7433.79	0.58 : 0.23 (e)	25	91.0636	490951		9982.19	9752.58	393175	54509	144.703	23388.2	541157	0	11003	10749.9	433381	60083.2	159.5	25779.9	3.18748	6	FAOSTAT (brazil)
	Rice, paddy (rice milled equivalent)	360952														360952
	Roots and tubers nes	49335														49335								2.88104
	Rubber, natural	5200						1.68393				0.782609			0.901324	5200	0	0	0	2416.7	0	0	2783.3
	Rye	275		4.60051	0.503 : 0.094 (f)		0.0636364	20.5156	20.5156							275	275	0	0	0	0	0	0	0.787966
	Seed cotton	117000				62.4		2163.99			207.792	1956.2				117000	0	0	11234.6	105765	0	0	0	0.928571	2	FAOSTAT (argentina)
	Sesame seed	13716														13716								0.628828	0.8	FAOSTAT (peru)
	Sorghum	1023314		11187.9	0.4 : 0.23 (e)	30	137.073	989328		43.7736	270908	716377	827.253	1104.54	68.0648	1023314	0	45.2773	280214	740986	855.671	1142.49	70.403	2.63924	2.8	FAOSTAT (brazil)
	Soybeans	2942131	80	41666.8	0.786 : 0.059 (f)	80	510.427	3.02764e+06			111278	2.90647e+06	9889.11			2942131	0	0	108136	2.82439e+06	9609.82	0	0	2.15869	3	Cunha (2018)
	Spices nes	4627														4627								0.803578
	Strawberries	3244						2904.4						2904.4		3244	0	0	0	0	0	3244	0	6.21456	15	FAOSTAT (peru)
	Sugar cane	9616440	35	6.73151	0.35 : 0.04 (e)	1.6	0.0824625	7.03017e+06		55593.7	3522.17	6.49622e+06	34846	437343	2640.41	9616440	0	76045.6	4817.92	8.88607e+06	47665.2	598234	3611.77	57.1795	73.752	Cunha (2018)
	Sunflower seed	121177				37		99468.4			1.65223	99466.7				121177	0	0	2.01282	121175	0	0	0	1.11427	1.6	FAOSTAT (brazil)
	Sweet potatoes	4483				5.16		3736.27		103.432	966.118	1475.08	19.109	1172.53		4483	0	124.104	1159.21	1769.89	22.9281	1406.87	0	4.17023	10	FAOSTAT (chile)
	Tangerines, mandarins, clementines, satsumas	235095				4.38889		208477		1619.58	895.105	112474	212.88	3749.57	89525	235095	0	1826.37	1009.39	126835	240.061	4228.32	100956	8.79287	19	FAOSTAT (brazil)
	Tea	1192														1192								4.35036
	Tobacco, unmanufactured	1178				39.0606		70.4199						70.4199		1178	0	0	0	0	0	1178	0	1.00512	2.063	Cunha (2018)
	Tomatoes	64715				5		65693.8	17.4293	198.365	1276.51	3173.58		60790.7	237.214	64715	17.1697	195.409	1257.49	3126.3	0	59885	233.679	13.4543	39	FAOSTAT (peru)
	Vegetables, fresh nes	1407														1407								6.86341
	Vegetables, leguminous nes	39988														39988								1.49371
	Watermelons	59701				37		48196.7		2308.67	4583.16	23742.3	1415.3	15535.7	611.503	59701	0	2859.74	5677.14	29409.5	1753.13	19244	757.466	13.4129	25	FAOSTAT (peru)
	Wheat	301689		4309	0.49 : 0.25 (e)	35	52.7545	324322	3281.44	16.722	36414.7	238629		45780	200.202	301689	3052.44	15.555	33873.5	221976	0	42585.2	186.231	1.5117	3.1	FAOSTAT (region)
	Data source	b	c	b	d, e, f	c,e,k,l,m,n,o,p,q,r,s	b	Census (2014)	Census (2014)	Census (2014)	Census (2014)	Census (2014)	Census (2014)	Census (2014)	Census (2014)

## Sheet: Table S3. Manure
	Process	Applied manure		Emissions from applied manure
	Manure type	Mass applied to soil (kg of N)	Ratio N:P	Manure applied to soil that leaches (kg of N)	Manure applied to soil that volatilizes (kg of N)
	Asses	138600	0.7 : 0.3 (g)	41580	27720
	Cattle, dairy	6.56765e+06	0.6 : 0.2 (g)	1.97427e+06	1.31618e+06
	Cattle, non-dairy	3.75397e+06	25 : 3.3 (i)	1.12619e+06	750795
	Chickens, broilers	4.19021e+07	53 : 16 (i)	1.25706e+07	8.38043e+06
	Chickens, layers	7811730	1.1 : 0.8 (g)	2343519	1562346
	Ducks	369573	0.6 : 1.4 (g)	110872	73914.6
	Goats	334233	4.9 : 4.1 (h)	100270	66846.7
	Horses	202171	0.7 : 0.3 (g)	60651.4	40434.3
	Llamas	611678	75 : 35 (j)	183503	122336
	Mules	18047	0.7 : 0.3 (g)	5414.1	3609.4
	Sheep	2768474	0.7 : 0.3 (g)	0	0
	Swine, breeding	1.70094e+06	3 : 0.4 (g)	510282	340188
	Swine, market	3.97181e+07	3 : 0.4 (g)	1.19154e+07	7.94363e+06
	Turkeys	167248	26 : 7.4 (i)	50174.4	33449.6
	Source	b	g, h, i, j	b	b

## Sheet: Table S4. Excreta
	Process:	Excreta
	Item	Protein supply quantity (g/capita/day)	Vegetal protein supply quantity (g/capita/day)
	Wheat and products	11.8	11.8
	Rice and products	5.65	5.65
	Barley and products	0	0
	Maize and products	6.24	6.24
	Rye and products	0	0
	Oats	0.35	0.35
	Cereals, Other	0.99	0.99
	Cassava and products	0.23	0.23
	Potatoes and products	4.21	4.21
	Sweet potatoes	0.02	0.02
	Roots, Other	0.08	0.08
	Sugar cane	0	0
	Sugar beet	0	0
	Sugar (Raw Equivalent)	0	0
	Sweeteners, Other	0	0
	Honey	0	0
	Beans	1.96	1.96
	Peas	0.22	0.22
	Pulses, Other and products	0.71	0.71
	Nuts and products	0.56	0.56
	Soyabeans	0.01	0.01
	Groundnuts	0.26	0.26
	Rape and Mustardseed	0	0
	Coconuts - Incl Copra	0.01	0.01
	Sesame seed	0.26	0.26
	Olives (including preserved)	0	0
	Oilcrops, Other	0	0
	Soyabean Oil	0.02	0.02
	Groundnut Oil	0	0
	Sunflowerseed Oil	0.01	0.01
	Rape and Mustard Oil	0	0
	Cottonseed Oil	0	0
	Palmkernel Oil	0	0
	Palm Oil	0	0
	Coconut Oil	0	0
	Sesameseed Oil	0	0
	Olive Oil	0	0
	Ricebran Oil	0	0
	Maize Germ Oil	0	0
	Oilcrops Oil, Other	0	0
	Tomatoes and products	0.15	0.15
	Onions	0.25	0.25
	Vegetables, Other	0.87	0.87
	Oranges, Mandarines	0.45	0.45
	Lemons, Limes and products	0.02	0.02
	Grapefruit and products	0	0
	Citrus, Other	0	0
	Bananas	0.2	0.2
	Plantains	0.61	0.61
	Apples and products	0.03	0.03
	Pineapples and products	0.04	0.04
	Dates	0	0
	Grapes and products (excl wine)	0.02	0.02
	Fruits, Other	0.19	0.19
	Coffee and products	0.33	0.33
	Cocoa Beans and products	0.28	0.28
	Tea (including mate)	0.06	0.06
	Pepper	0	0
	Pimento	0.02	0.02
	Cloves	0	0
	Spices, Other	0.11	0.11
	Wine	0	0
	Beer	0.29	0.29
	Beverages, Fermented	0	0
	Beverages, Alcoholic	0	0
	Bovine Meat	8.49	0
	Mutton & Goat Meat	1.14	0
	Pigmeat	2.52	0
	Poultry Meat	13.54	0
	Meat, Other	0.76	0
	Offals, Edible	2.19	0
	Butter, Ghee	0	0
	Cream	0	0
	Fats, Animals, Raw	0.04	0
	Fish, Body Oil	0	0
	Fish, Liver Oil	0	0
	Eggs	2	0
	Milk - Excluding Butter	4.02	0
	Freshwater Fish	0.28	0
	Demersal Fish	0	0
	Pelagic Fish	0.11	0
	Marine Fish, Other	0.36	0
	Crustaceans	0	0
	Cephalopods	0	0
	Molluscs, Other	0	0
	Aquatic Animals, Others	0	0
	Aquatic Plants	0	0
	Infant food	0.19	0
	Miscellaneous	0.05	0
	Source:	b	b

## Sheet: Table S5. Area-Census 2014
	Region	Cultivated area 2014 (ha)	Proportional area cultivated	Cultivated area 2018 (ha)	Area fertilized with manure (ha)	Proportional area fertilized with manure
	Bolivia	4.53886e+06	1	3741772	374962	1
	Altiplano	251691	0.0554526	207491	110483	0.294651
	Amazonia	123356	0.0271778	101693	143.943	0.000383888
	Chaco	436487	0.0961666	359834	8519.9	0.022722
	Chiquitania-Pantanal	2.97834e+06	0.656188	2.45531e+06	58843	0.15693
	Llanuras	115579	0.0254643	95281.6	37.632	0.000100362
	Valles	438316	0.0965696	361341	186570	0.497571
	Yungas-Chapare	195086	0.0429813	160826	10364.6	0.0276418
	Source	Census (2014)		INIAF (2018)	Census (2014)
